# Supplementary material for: Light induced intraspecific variability in response to thermal stress in the hard coral Stylophora pistillata
Source: PeerJ journal article supplement (doi:10.7717/peerj.3802), 2017-10-11

**AFTER  
FRAGGING**

**44**

**51**

**57**

**CTC1**

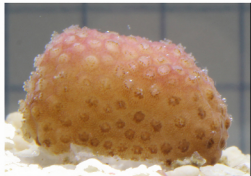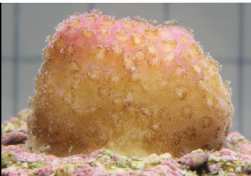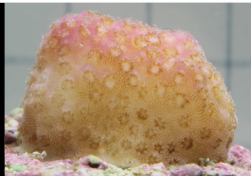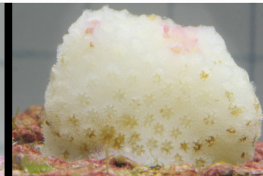

**ETC1**

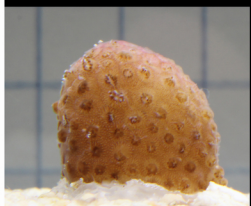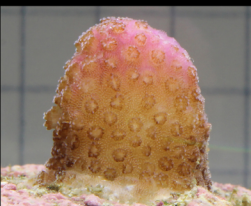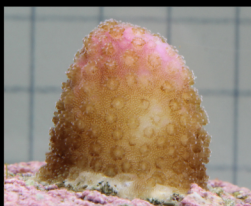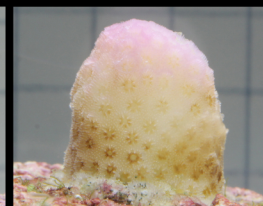

**CTC2**

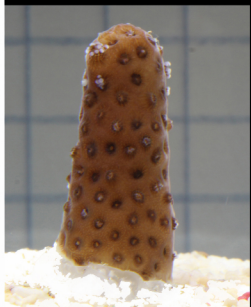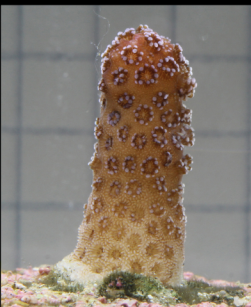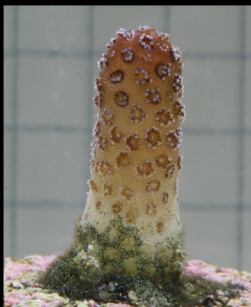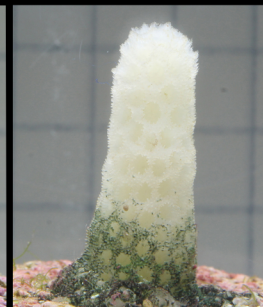

**ETC2**

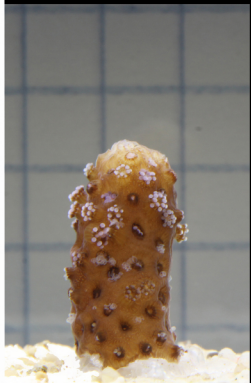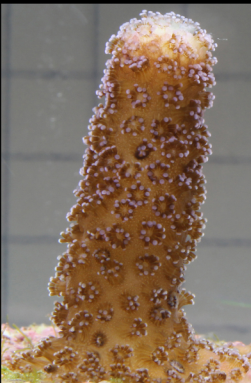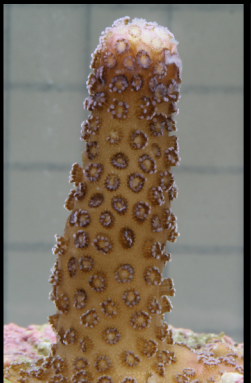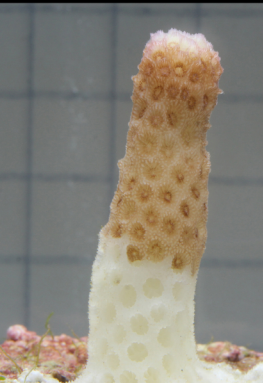

**CTC3**

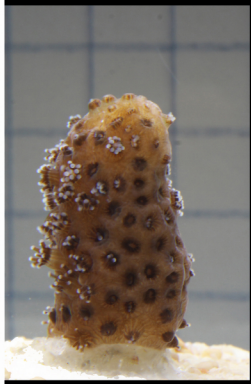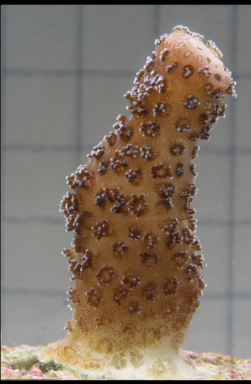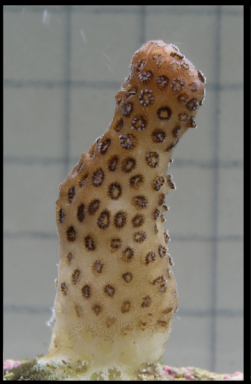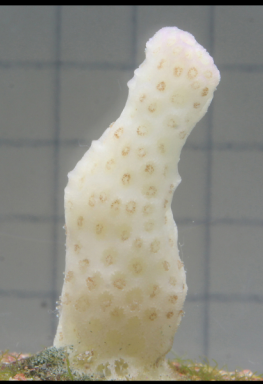

**ETC3**

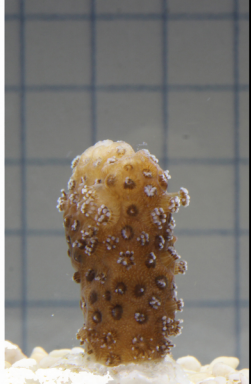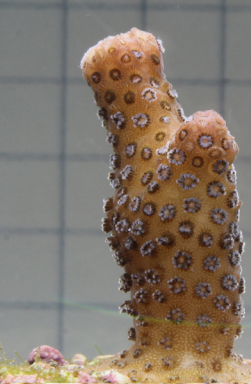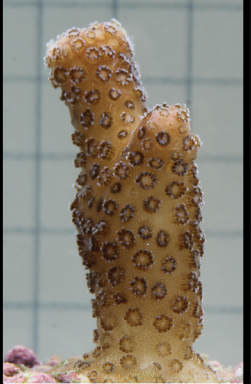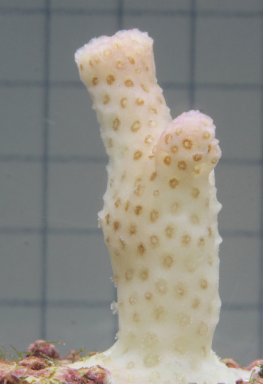

Supplement: FigS2.pdf [file FigS2.pdf]
