# Supplementary material for: Light induced intraspecific variability in response to thermal stress in the hard coral Stylophora pistillata
Source: PeerJ journal article supplement (doi:10.7717/peerj.3802), 2017-10-11
Supplement: FigS3.pdf [file FigS3.pdf]

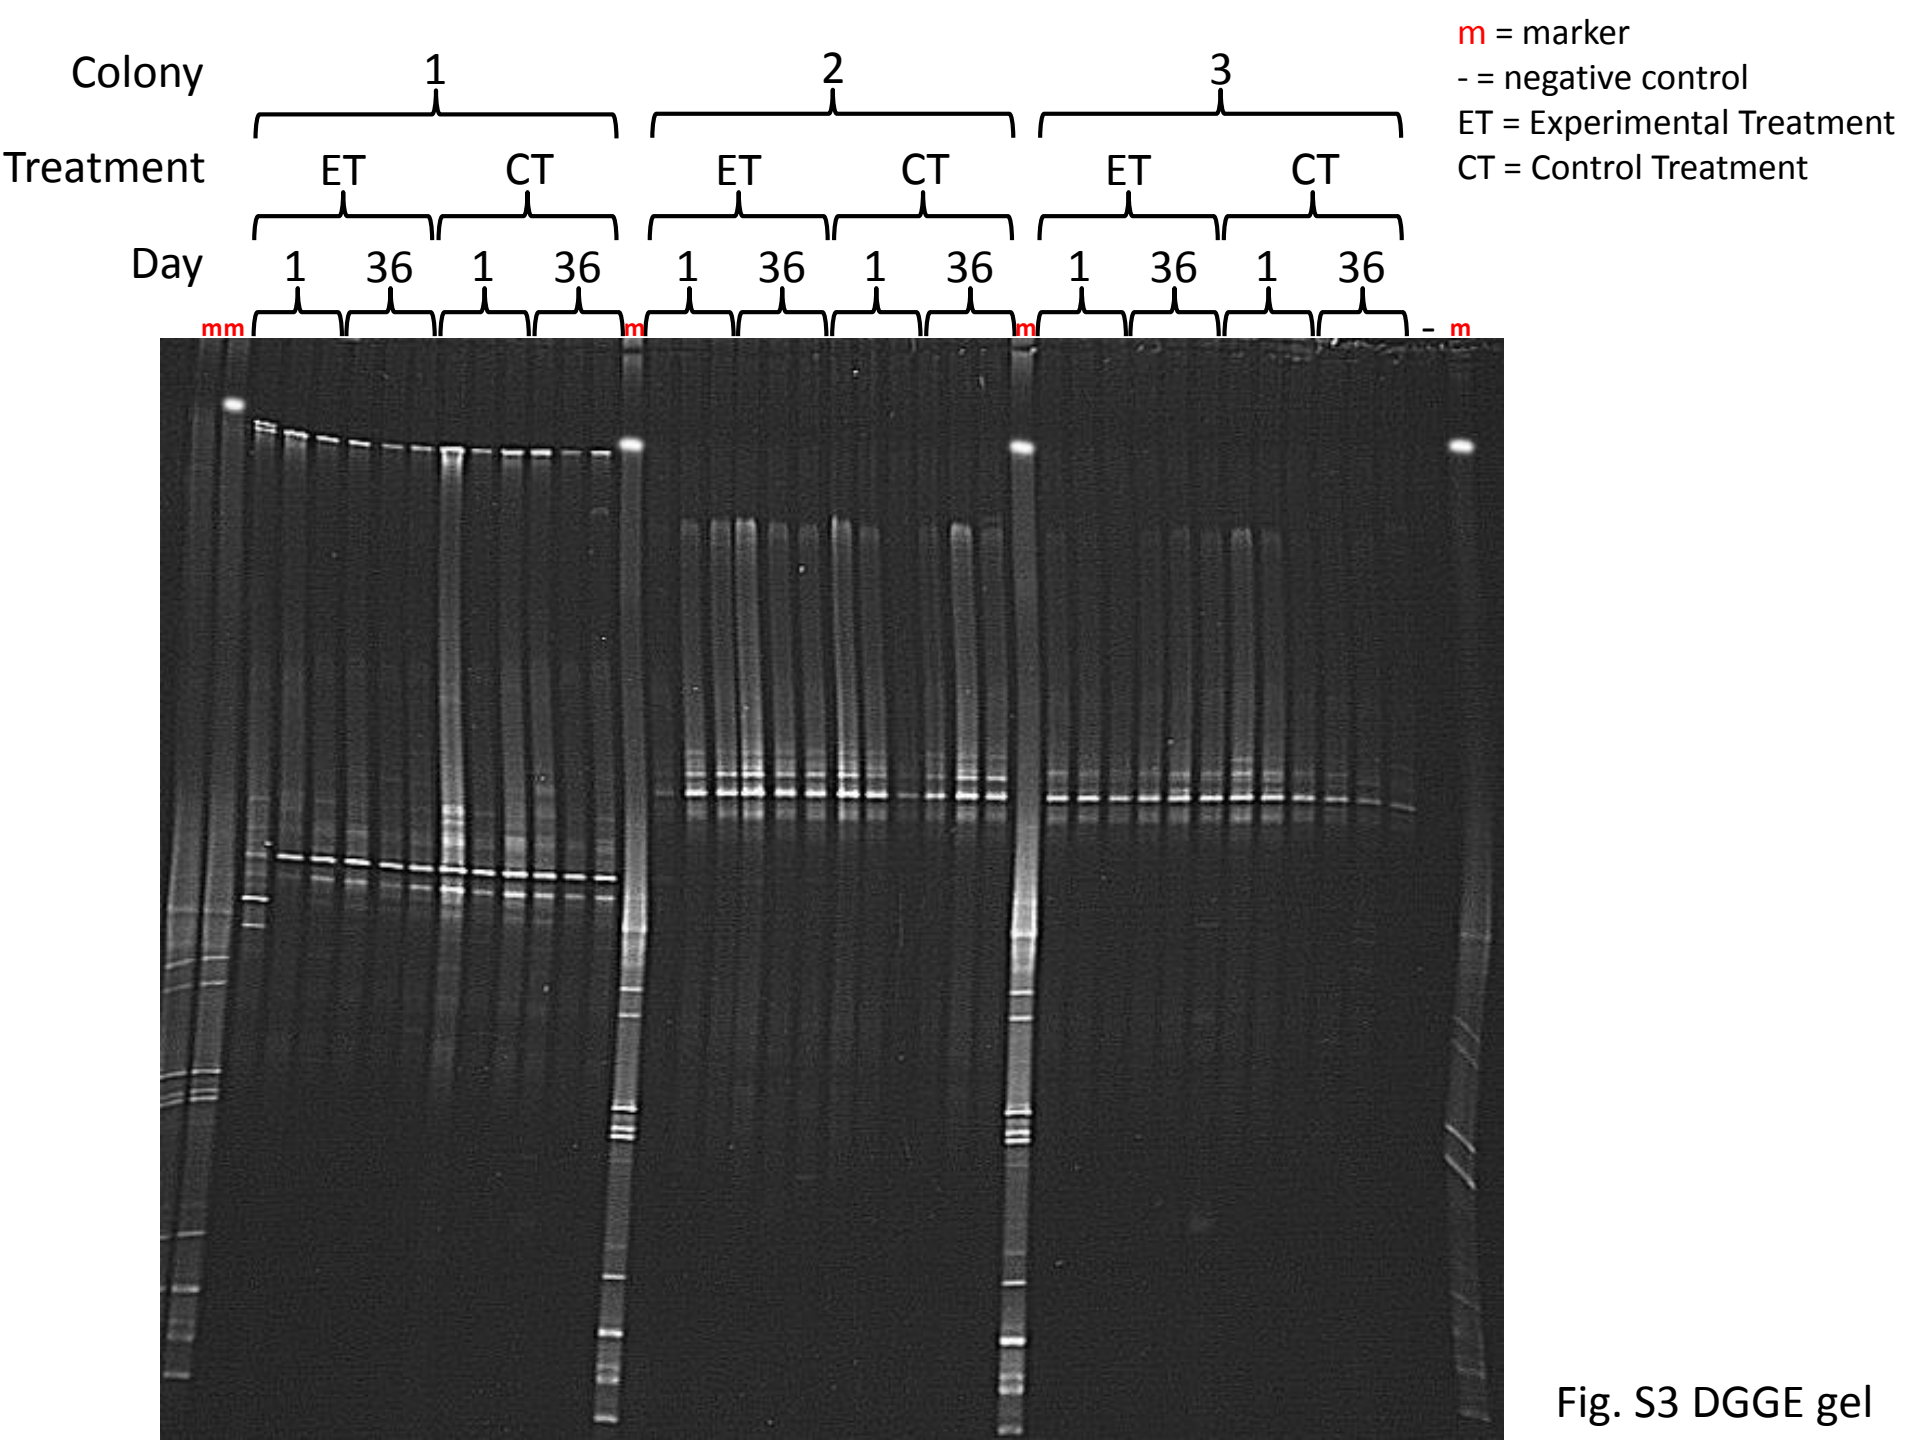

Fig. S3 DGGE gel
