# Supplementary material for: Light induced intraspecific variability in response to thermal stress in the hard coral Stylophora pistillata
Source: PeerJ. 2017 Oct 11;5:e3802. doi: 10.7717/peerj.3802 (PMC5640979; doi:10.7717/peerj.3802)
Supplement: Supplemental Information 1 [file peerj-05-3802-s001.xlsx]

## Sheet: Ramet ID
Frag #	Colony	Light Treatment
1-20	1	Experimental
21-40	2	Experimental
41-60	3	Experimental
61-80	1	Control
81-100	2	Control
101-120	3	Control

## Sheet: SGR
Frag #	Light treatment	Colony	Net Weight Start After Fragging (g)	Net Weight Day 2 (g)	Net Weight End (g)	SGR1 (Day-1)	SGR2 (Day-1)	SGR3 (Day-1)	Gross Weight (g)	Weight Rock + Glue (g)	Weight End Gross (g)	Days since fragging (until treatment)	Treatment days	Days since fragging (total)
2	Experimental	Colony 1	1.42	1.67286	1.97	0.00547746	0.00503656	0.00467146	15.78	14.36	16.33	30	35	65
4	Experimental	Colony 1	2.67	3.14544	3.92	0.00547746	0.0059079	0.00628965	15.85	13.18	17.1	30	35	65
6	Experimental	Colony 1	1.7	2.00271	2.64	0.00547746	0.00677155	0.00789358	17	15.3	17.94	30	35	65
8	Experimental	Colony 1	1.14	1.343	1.86	0.00547746	0.00753151	0.00930494	16.27	15.13	16.99	30	35	65
10	Experimental	Colony 1	0.89	1.04848	1.56	0.00547746	0.00863415	0.0113527	15.89	15	16.56	30	35	65
11	Experimental	Colony 1	0.84	0.989577	1.33	0.00547746	0.00706973	0.00844734	14.05	13.21	14.54	30	35	65
12	Experimental	Colony 1	1.48	1.74354	2.37	0.00547746	0.00724381	0.00877064	14.79	13.31	15.68	30	35	65
14	Experimental	Colony 1	1.48	1.74354	2.26	0.00547746	0.00651266	0.00741278	13.74	12.26	14.52	30	35	65
17	Experimental	Colony 1	0.63	0.742183	1.41	0.00547746	0.0123942	0.0183357	13.68	13.05	14.46	30	35	65
18	Experimental	Colony 1	1.47	1.73176	2.23	0.00547746	0.00641137	0.00722468	14.25	12.78	15.01	30	35	65
20	Experimental	Colony 1	2.3	2.70956	3.31	0.00547746	0.0056006	0.00571896	17.01	14.71	18.02	30	35	65
22	Experimental	Colony 2	0.72	0.961682	1.23	0.00969444	0.00823874	0.00703102	14.13	13.41	14.64	30	35	65
23	Experimental	Colony 2	0.41	0.547624	0.94	0.00969444	0.012765	0.0154369	13.43	13.02	13.96	30	35	65
25	Experimental	Colony 2	0.64	0.854828	1.17	0.00969444	0.0092814	0.00896738	14.62	13.98	15.15	30	35	65
29	Experimental	Colony 2	0.74	0.988395	1.77	0.00969444	0.0134167	0.0166472	13.69	12.95	14.72	30	35	65
30	Experimental	Colony 2	0.52	0.694548	1.03	0.00969444	0.0105152	0.0112587	13.05	12.53	13.56	30	35	65
31	Experimental	Colony 2	0.52	0.694548	1.5	0.00969444	0.0162983	0.0219988	15.02	14.5	16	30	35	65
33	Experimental	Colony 2	0.74	0.988395	1.45	0.00969444	0.0103487	0.0109496	14.39	13.65	15.1	30	35	65
34	Experimental	Colony 2	0.6	0.801402	1.29	0.00969444	0.0117764	0.013601	14.77	14.17	15.46	30	35	65
36	Experimental	Colony 2	0.45	0.601051	0.93	0.00969444	0.0111683	0.0124716	12.78	12.33	13.26	30	35	65
39	Experimental	Colony 2	0.54	0.721261	1.3	0.00969444	0.0135162	0.0168319	15.28	14.74	16.04	30	35	65
40	Experimental	Colony 2	0.6	0.801402	1.31	0.00969444	0.0120131	0.0140406	14.78	14.18	15.49	30	35	65
43	Experimental	Colony 3	0.56	0.742406	1.33	0.00977017	0.0135156	0.0166582	14.29	13.73	15.06	29	35	64
44	Experimental	Colony 3	0.46	0.609834	1.3	0.00977017	0.0162327	0.0216267	12.85	12.39	13.69	29	35	64
47	Experimental	Colony 3	0.35	0.464004	0.91	0.00977017	0.0149299	0.0192443	13.93	13.58	14.49	29	35	64
48	Experimental	Colony 3	0.38	0.503776	1.07	0.00977017	0.0161757	0.0215224	15.07	14.69	15.76	29	35	64
49	Experimental	Colony 3	0.57	0.755664	1.39	0.00977017	0.0139285	0.0174132	11.17	10.6	11.99	29	35	64
50	Experimental	Colony 3	0.64	0.848464	1.57	0.00977017	0.0140213	0.0175829	15.7	15.06	16.63	29	35	64
52	Experimental	Colony 3	0.43	0.570062	1.09	0.00977017	0.0145336	0.0185197	13.91	13.48	14.57	29	35	64
54	Experimental	Colony 3	0.57	0.755664	1.31	0.00977017	0.0130023	0.0157196	16.46	15.89	17.2	29	35	64
56	Experimental	Colony 3	0.61	0.808693	1.34	0.00977017	0.0122963	0.0144287	13.35	12.74	14.08	29	35	64
58	Experimental	Colony 3	0.51	0.67612	1.36	0.00977017	0.0153255	0.0199677	14.96	14.45	15.81	29	35	64
59	Experimental	Colony 3	0.37	0.490518	0.95	0.00977017	0.0147337	0.0188857	12.53	12.16	13.11	29	35	64
62	Control	Colony 1	1.55	1.72699	1.96	0.00361061	0.00361061	0.00361618	13.73	12.18	14.14	30	35	65
64	Control	Colony 1	1.94	2.20825	2.57	0.00432643	0.00432643	0.00433443	16.51	14.57	17.14	30	35	65
65	Control	Colony 1	1.29	1.49226	1.77	0.00486673	0.00486673	0.00487685	14.32	13.03	14.8	30	35	65
67	Control	Colony 1	1.15	1.39503	1.75	0.00645929	0.00645929	0.00647709	14.64	13.49	15.24	30	35	65
68	Control	Colony 1	1.88	2.22459	2.71	0.0056258	0.0056258	0.00563931	16.41	14.53	17.24	30	35	65
70	Control	Colony 1	1.66	1.92889	2.3	0.00501679	0.00501679	0.00502754	14.89	13.23	15.53	30	35	65
72	Control	Colony 1	2.03	2.33064	2.74	0.00461419	0.00461419	0.00462328	14.23	12.2	14.94	30	35	65
75	Control	Colony 1	1.77	2.04418	2.42	0.00481212	0.00481212	0.00482202	17.12	15.35	17.77	30	35	65
76	Control	Colony 1	0.77	0.983041	1.31	0.00817526	0.00817526	0.00820375	15.95	15.18	16.49	30	35	65
78	Control	Colony 1	0.54	0.689852	0.92	0.00819699	0.00819699	0.00822563	13.91	13.37	14.29	30	35	65
79	Control	Colony 1	1.57	1.79895	2.11	0.00454788	0.00454788	0.00455672	15.23	13.66	15.77	30	35	65
82	Control	Colony 2	0.73	0.997214	1.44	0.0104516	0.0104516	0.0104981	15.8	15.07	16.51	30	35	65
83	Control	Colony 2	1.04	1.21194	1.45	0.00511297	0.00511297	0.00512413	14.16	13.12	14.57	30	35	65
84	Control	Colony 2	0.75	0.962312	1.29	0.00834345	0.00834345	0.00837312	15.28	14.53	15.82	30	35	65
86	Control	Colony 2	0.42	0.601839	0.92	0.0120634	0.0120634	0.0121252	14.94	14.52	15.44	30	35	65
88	Control	Colony 2	0.77	0.993282	1.34	0.00852361	0.00852361	0.00855457	13.82	13.05	14.39	30	35	65
89	Control	Colony 2	0.55	0.72715	1.01	0.00935057	0.00935057	0.00938781	16.83	16.28	17.29	30	35	65
90	Control	Colony 2	0.48	0.681387	1.03	0.0117466	0.0117466	0.0118053	14.59	14.11	15.14	30	35	65
93	Control	Colony 2	0.78	1.04028	1.46	0.00964458	0.00964458	0.00968419	12.53	11.75	13.21	30	35	65
97	Control	Colony 2	0.47	0.623652	0.87	0.00947324	0.00947324	0.00951146	16.32	15.85	16.72	30	35	65
98	Control	Colony 2	0.36	0.530934	0.84	0.0130354	0.0130354	0.0131075	13.62	13.26	14.1	30	35	65
99	Control	Colony 2	0.46	0.599954	0.82	0.00889351	0.00889351	0.0089272	13.49	13.03	13.85	30	35	65
101	Control	Colony 3	0.72	0.913451	1.22	0.00823992	0.00823992	0.0082679	13.16	12.44	13.66	29	35	64
102	Control	Colony 3	0.5	0.648535	0.89	0.00900958	0.00900958	0.00904301	13.06	12.56	13.45	29	35	64
103	Control	Colony 3	0.61	0.851812	1.28	0.0115806	0.0115806	0.0116357	16.68	16.07	17.35	29	35	64
106	Control	Colony 3	0.63	0.848651	1.22	0.0103263	0.0103263	0.0103702	15.09	14.46	15.68	29	35	64
112	Control	Colony 3	0.82	1.02007	1.33	0.00755672	0.00755672	0.00758026	14.51	13.69	15.02	29	35	64
113	Control	Colony 3	0.53	0.64899	0.83	0.00700857	0.00700857	0.00702883	13.97	13.44	14.27	29	35	64
114	Control	Colony 3	0.68	0.913872	1.31	0.0102452	0.0102452	0.0102883	13.22	12.54	13.85	29	35	64
117	Control	Colony 3	0.56	0.815342	1.29	0.0130384	0.0130384	0.0131083	16.65	16.09	17.38	29	35	64
118	Control	Colony 3	0.71	0.967282	1.41	0.01072	0.01072	0.0107673	17.91	17.2	18.61	29	35	64
119	Control	Colony 3	0.76	1.00107	1.4	0.00954545	0.00954545	0.00958296	15.85	15.09	16.49	29	35	64
120	Control	Colony 3	0.76	1.0201	1.46	0.0102011	0.0102011	0.010244	15.74	14.98	16.44	29	35	64
		total ramet weight	58.19	72.1948	101.07

## Sheet: Luminosity
	Experimental									Control
	Colony 1			Colony 2			Colony 3			Colony 1			Colony 2			Colony 3
Day	Coral 2	Coral 10	Coral 12	Coral 23	Coral 34	Coral 40	Coral 43	Coral 50	Coral 58	Coral 62	Coral 72	Coral 76	Coral 83	Coral 89	Coral 98	Coral 103	Coral 112	Coral 119
2	143.035	115.705	128.795	71.97	71.52	87.915	79.985	76.78	83	166.88	117.78	133.6	87.04	74.875	81.62	75.675	73.66	66.605
9	155.135	111.33	133.645	78.52	83.325	84.15	72.95	74.96	79.52	169.045	130.445	136.29	87.31	77.92	73.08	75.38	73.275	70.48
16	144.775	103.91	131.8	78.72	80.8	70.995	71.155	76.82	73.275	155.365	115.145	109.575	81.525	74.035	67.63	68.335	71.235	67.985
23	155.56	131.735	147.595	91.745	86.67	91.685	81.855	97.08	95.945	164.485	119.02	128.935	96.95	85.945	82.3	89.92	83.85	79.225
30	138.28	125.57	150.35	90.755	87.27	87.835	85.205	104.575	104.965	172.57	125.93	146.405	100.835	85.26	79.745	91.55	85.3	87.125
37	151.36	128.615	144.495	99.58	97.6	92.775	89.34	103.98	116.96	165.95	132.78	144.675	104.755	88.735	89.395	104.595	92.885	89.19
44	140.93	129.885	152.765	102.325	94.955	102.145	96.705	102.505	118.695	164.35	125.99	145.48	101.765	105.555	98.65	116.735	101.64	94.87
51	129.585	131.02	145.45	100.845	107.555	103.28	101.735	101.11	110.11	157.77	128.57	146.46	104.605	105.25	102.06	120.87	101.945	104.79
57	NA	178.765	178.11	136.17	135.255	147.295	177.77	179.77	183.225	NA	NA	NA	NA	NA	NA	212.565	181.4	190.045
68	NA	NA	NA	191.02	188.405	170.125	173.535	191.615	193.65	NA	NA	NA	NA	NA	NA	215.565	204.125	190.465
	Unit = %

## Sheet: Necrosis
			2	9	16	23	30	37	44	51	57	68	<=Day
Experimental	Colony 1	Coral 2	0	0	0	0	0	0	5.53389	6.91674	100	100
		Coral 10	0	0	0	0	0	0	4.19792	7.39471	40.5943	100
		Coral 12	0	0	0	0	0	0	0	0	45.1247	100
	Colony 2	Coral 23	0	0	0	0	0	0	0	0	50.5285	54.7041
		Coral 34	0	0	0	0	0	0	0	0	54.083	53.5376
		Coral 40	0	0	0	0	0	0	0	0	61.4506	65.4007
	Colony 3	Coral 43	0	0	0	0	0	0	0	0	0	0
		Coral 50	0	0	0	0	0	0	0	0	0	0
		Coral 58	0	0	0	0	0	0	0	0	0	0
Control	Colony 1	Coral 62	0	0	0	0	0	0	0	0	77.4706	100
		Coral 72	0	0	0	0	0	0	11.4316	13.7371	90.3628	100
		Coral 76	0	0	0	0	0	0	0	0	100	100
	Colony 2	Coral 83	0	0	0	0	0	0	11.0556	27.5514	100	100
		Coral 89	0	0	0	0	0	0	13.9043	41.1077	100	100
		Coral 98	0	0	0	0	0	0	18.4507	24.2188	100	100
	Colony 3	Coral 103	0	0	0	0	0	19.9176	31.0323	44.5665	43.0331	47.5552
		Coral 112	0	0	0	0	0	0	13.7314	21.7891	27.2742	31.3166
		Coral 119	0	0	0	0	0	0	10.4216	22.5943	23.7791	27.7872
		Unit = %

## Sheet: Calibration Surface
Object	Surface Area (cm2)	Weight before dip (g)	Weight after dip (g)	Difference (g)
Marble	1.09359	0.37	0.41	0.04
Marble	1.05683	0.35	0.39	0.04
Marble	3.20474	3.13	3.3	0.17
Marble	4.15476	3.78	3.95	0.17
Marble	4.15476	3.74	3.92	0.18
Marble	4.83051	4.37	4.57	0.2
Marble	4.52389	3.98	4.13	0.15
Marble	5.64104	4.18	4.4	0.22
Marble	5.30929	4	4.19	0.19
Marble	5.72555	5.01	5.24	0.23
Marble	7.54768	6.84	7.24	0.4
Marble	7.06858	6.31	6.64	0.33
Marble	8.04248	7.25	7.63	0.38
Marble	14.522	14.99	15.56	0.57
Marble	18.2467	21.19	22.03	0.84

## Sheet: Cell density
Frag #	Surface area (cm2)	Volume (ml)	Count 1 (per 0.1µL)	Count 2 (per 0.1µL)	Count Mean (zoox µL-1 )	Zoox ml-1	Zoox cm-2
7	3.2194	0.8	60	64	620	496000	154066
13	2.7858	0.832	40	37	385	320320	114983
16	3.0026	0.772	57	60	585	451620	150410
24	2.569	0.834	129	143	1360	1134240	441510
26	1.7018	0.856	45	46	455	389480	228864
32	1.9186	0.785	99	104	1015	796775	415290
41	2.3522	0.764	172	185	1785	1363740	579772
46	3.0026	0.832	300	323	3115	2591680	863145
57	2.569	0.818	536	480	5080	4155440	1.61753e+06
63	5.3874	0.905	22	26	240	217200	40316.3
69	3.8698	0.821	99	94	965	792265	204730
71	3.0026	0.776	49	55	520	403520	134390
87	1.7018	0.778	71	73	720	560160	329157
94	1.485	0.782	73	79	760	594320	400215
100	1.7018	0.772	89	100	945	729540	428687
109	1.7018	0.758	151	136	1435	1087730	639164
111	2.569	0.775	400	384	3920	3038000	1.18256e+06
115	2.569	0.76	276	276	2760	2097600	816504
5	3.4362	0.929	94	81	875	812875	236562
15	4.737	0.837	167	131	1490	1247130	263274
19	2.3522	0.765	17	27	220	168300	71550
35	1.9186	0.822	256	245	2505	2059110	1.07324e+06
37	2.7858	0.772	172	173	1725	1331700	478031
38	2.1354	0.794	172	184	1780	1413320	661853
45	2.569	0.808	153	162	1575	1272600	495368
51	2.3522	0.822	163	184	1735	1426170	606313
53	2.1354	0.806	279	338	3085	2486510	1.16442e+06
66	3.653	0.843	66	45	555	467865	128077
73	3.4362	0.822	91	97	940	772680	224865
77	3.0026	0.818	68	51	595	486710	162096
91	1.7018	0.856	105	129	1170	1001520	588506
95	1.485	0.867	120	131	1255	1088085	732717
96	2.1354	0.882	50	56	530	467460	218910
105	3.0026	0.812	257	292	2745	2228940	742337
110	1.9186	0.858	100	119	1095	939510	489685
116	1.7018	0.84	178	180	1790	1503600	883535
1	3.4362	0.826	116	123	1195	987070	287256
3	2.7858	0.808	79	71	750	606000	217532
9	5.821	0.844	86	84	850	717400	123243
21	2.569	0.829	196	252	2240	1856960	722834
27	2.7858	0.802	297	291	2940	2357880	846392
28	2.7858	0.819	226	235	2305	1887795	677649
42	2.3522	0.823	242	246	2440	2008120	853720
55	2.7858	0.81	208	185	1965	1591650	571344
60	2.7858	0.798	365	356	3605	2876790	1.03266e+06
61	3.4362	0.822	138	134	1360	1117920	325336
74	4.9538	0.839	45	60	525	440475	88916.6
80	3.0026	0.822	110	124	1170	961740	320302
81	1.7018	0.79	166	154	1600	1264000	742743
85	1.9186	0.82	182	180	1810	1484200	773585
92	2.1354	0.813	178	169	1735	1410555	660558
104	2.569	0.823	198	215	2065	1699495	661540
107	3.2194	0.804	714	636	6750	5427000	1.68572e+06
108	2.3522	0.82	496	440	4680	3837600	1.63149e+06
11	2.569	0.82	57	55	560	459200	178747
14	4.3034	0.83	91	95	930	771900	179370
17	2.569	0.82	68	67	675	553500	215453
25	2.3522	0.82	160	142	1510	1238200	526401
29	2.3522	0.82	116	123	1195	979900	416589
31	1.7018	0.81	145	153	1490	1206900	709190
48	1.9186	0.81	28	35	315	255150	132988
52	3.0026	0.83	9	7	80	66400	22114.2
54	3.653	0.82	20	20	200	164000	44894.6
67	3.4362	0.83	51	53	520	431600	125604
68	4.3034	0.8	150	133	1415	1132000	263048
75	4.9538	0.83	108	93	1005	834150	168386
88	1.2682	0.81	73	55	640	518400	408768
93	2.1354	0.82	114	122	1180	967600	453124
106	2.3522	0.82	5	13	90	73800	31374.9
113	2.1354	0.82	2	4	30	24600	11520.1
117	2.1354	0.82	13	16	145	118900	55680.4

## Sheet: Chlorophyll a
Frag #	Dilution	Zoox total	Weight (g)	Volume (ml)	Absorbance	Absorbance - Blanco	Chla (ug ml-1)	Chla (ug ml-1) dilution	Total Chla (ug)	Chla (pg cell-1)	Chla (ug cell-1)
Blanco	-				912.83	0	0	0		0
7	10	496000	1.28	0.8	226460	225547	0.123484	1.23484	0.987874	1.99168	1.99168e-06
13	10	320320	0.81	0.832	151964	151051	0.0830616	0.830616	0.691073	2.15744	2.15744e-06
16	10	451620	1.01	0.772	225170	224257	0.122784	1.22784	0.947893	2.09887	2.09887e-06
24	10	1134240	0.62	0.834	1.15812e+06	1.15721e+06	0.629014	6.29014	5.24597	4.6251	4.6251e-06
26	10	389480	0.35	0.856	396375	395462	0.215682	2.15682	1.84624	4.74026	4.74026e-06
32	10	796775	0.35	0.785	952992	952079	0.517708	5.17708	4.06401	5.10057	5.10057e-06
41	100	1363740	0.48	0.764	157656	156743	0.0861502	8.61502	6.58187	4.82634	4.82634e-06
46	100	2591680	0.81	0.832	317675	316762	0.172978	17.2978	14.3918	5.55307	5.55307e-06
57	100	4155440	0.68	0.818	534929	534016	0.290862	29.0862	23.7926	5.72564	5.72564e-06
63	10	217200	3.05	0.905	76752.6	75839.8	0.0422514	0.422514	0.382376	1.76048	1.76048e-06
69	10	792265	1.85	0.821	585404	584491	0.318251	3.18251	2.61284	3.29794	3.29794e-06
71	10	403520	1.78	0.776	325935	325022	0.17746	1.7746	1.37709	3.41269	3.41269e-06
87	10	560160	0.33	0.778	603144	602231	0.327877	3.27877	2.55088	4.55384	4.55384e-06
94	10	594320	0.39	0.782	648416	647503	0.352442	3.52442	2.75609	4.63739	4.63739e-06
100	10	729540	0.42	0.772	888757	887844	0.482853	4.82853	3.72763	5.10956	5.10956e-06
109	100	1087730	0.4	0.758	197129	196216	0.107569	10.7569	8.15371	7.49608	7.49608e-06
111	100	3038000	0.8	0.775	494393	493480	0.268867	26.8867	20.8372	6.85886	6.85886e-06
115	100	2097600	0.67	0.76	388748	387835	0.211543	21.1543	16.0773	7.6646	7.6646e-06
5	10	812875	1.57	0.929	351239	350326	0.19119	1.9119	1.77616	2.18503	2.18503e-06
15	10	1247130	2.49	0.837	542617	541704	0.295034	2.95034	2.46944	1.98009	1.98009e-06
19	10	168300	0.79	0.765	64897.5	63984.7	0.0358187	0.358187	0.274013	1.62812	1.62812e-06
35	100	2059110	0.45	0.822	147275	146362	0.0805177	8.05177	6.61855	3.21428	3.21428e-06
37	100	1331700	0.6	0.772	155964	155051	0.0852322	8.52322	6.57992	4.94099	4.94099e-06
38	100	1413320	0.57	0.794	206374	205461	0.112585	11.2585	8.93927	6.32502	6.32502e-06
45	100	1272600	0.7	0.808	165662	164750	0.0904947	9.04947	7.31198	5.7457	5.7457e-06
51	100	1426170	0.5	0.822	155027	154115	0.0847241	8.47241	6.96432	4.88323	4.88323e-06
53	100	2486510	0.55	0.806	353779	352866	0.192569	19.2569	15.521	6.2421	6.2421e-06
66	10	467865	1.52	0.843	239904	238991	0.130779	1.30779	1.10246	2.35637	2.35637e-06
73	10	772680	1.29	0.822	354390	353477	0.1929	1.929	1.58564	2.05213	2.05213e-06
77	10	486710	1.42	0.818	206250	205337	0.112518	1.12518	0.920396	1.89106	1.89106e-06
91	10	1001520	0.4	0.856	867951	867038	0.471563	4.71563	4.03658	4.03046	4.03046e-06
95	10	1088085	0.47	0.867	897727	896815	0.487721	4.87721	4.22854	3.88622	3.88622e-06
96	10	467460	0.56	0.882	510792	509879	0.277765	2.77765	2.44989	5.24086	5.24086e-06
105	100	2228940	0.6	0.812	278970	278057	0.151976	15.1976	12.3405	5.53648	5.53648e-06
110	10	939510	0.45	0.858	758962	758049	0.412425	4.12425	3.5386	3.76644	3.76644e-06
116	100	1503600	0.26	0.84	167689	166776	0.0915944	9.15944	7.69393	5.11701	5.11701e-06
1	10	987070	1.17	0.826	477821	476909	0.259875	2.59875	2.14657	2.17469	2.17469e-06
3	10	606000	0.9	0.808	221694	220781	0.120898	1.20898	0.976858	1.61198	1.61198e-06
9	10	717400	2.34	0.844	361916	361003	0.196984	1.96984	1.66254	2.31746	2.31746e-06
21	100	1856960	0.49	0.829	188384	187471	0.102824	10.2824	8.52409	4.59035	4.59035e-06
27	100	2357880	0.57	0.802	182373	181460	0.0995622	9.95622	7.98489	3.38647	3.38647e-06
28	100	1887795	0.52	0.819	167929	167016	0.0917246	9.17246	7.51224	3.97937	3.97937e-06
42	100	2008120	0.48	0.823	143144	142231	0.078276	7.8276	6.44212	3.20803	3.20803e-06
55	100	1591650	0.68	0.81	136118	135205	0.0744638	7.44638	6.03156	3.7895	3.7895e-06
60	100	2876790	0.71	0.798	258801	257888	0.141033	14.1033	11.2544	3.91214	3.91214e-06
61	10	1117920	1.67	0.822	571300	570387	0.310598	3.10598	2.55311	2.28381	2.28381e-06
74	10	440475	2.9	0.839	271196	270283	0.147758	1.47758	1.23969	2.81444	2.81444e-06
80	10	961740	1.18	0.822	365356	364444	0.198851	1.98851	1.63455	1.69958	1.69958e-06
81	10	1264000	0.23	0.79	1.07934e+06	1.07842e+06	0.586263	5.86263	4.63148	3.66414	3.66414e-06
85	10	1484200	0.55	0.82	1231050	1.23014e+06	0.668585	6.68585	5.48239	3.69384	3.69384e-06
92	10	1410555	0.54	0.813	1.44034e+06	1.43943e+06	0.782148	7.82148	6.35886	4.50806	4.50806e-06
104	10	1699495	0.65	0.823	1.24537e+06	1.24446e+06	0.676357	6.76357	5.56642	3.27534	3.27534e-06
107	100	5427000	0.88	0.804	645586	644673	0.350906	35.0906	28.2129	5.19861	5.19861e-06
108	100	3837600	0.66	0.82	437137	436224	0.237799	23.7799	19.4996	5.08118	5.08118e-06
11	10	459200	1.01	0.82	131104	130191	0.0717431	0.717431	0.588293	1.28113	1.28113e-06
14	10	771900	1.92	0.83	415885	414972	0.226268	2.26268	1.87803	2.43299	2.43299e-06
17	10	553500	0.8	0.82	239782	238870	0.130713	1.30713	1.07185	1.93649	1.93649e-06
25	10	1238200	0.33	0.82	445454	444541	0.242312	2.42312	1.98696	1.60472	1.60472e-06
29	100	979900	0.53	0.82	91603	90690.1	0.0503094	5.03094	4.12537	4.20999	4.20999e-06
31	10	1206900	0.34	0.81	545356	544443	0.29652	2.9652	2.40181	1.99007	1.99007e-06
48	10	255150	0.47	0.81	139885	138972	0.0765077	0.765077	0.619713	2.42882	2.42882e-06
52	10	66400	0.6	0.83	58057.1	57144.2	0.032107	0.32107	0.266488	4.01338	4.01338e-06
54	10	164000	0.82	0.82	72878.1	71965.2	0.0401491	0.401491	0.329222	2.00745	2.00745e-06
67	10	431600	1.46	0.83	293718	292806	0.159979	1.59979	1.32783	3.07652	3.07652e-06
68	10	1132000	2.47	0.8	1.0674e+06	1.06649e+06	0.579788	5.79788	4.6383	4.09744	4.09744e-06
75	10	834150	2.3	0.83	520286	519374	0.282917	2.82917	2.34821	2.8151	2.8151e-06
88	10	518400	0.26	0.81	461383	460470	0.250956	2.50956	2.03274	3.92118	3.92118e-06
93	10	967600	0.41	0.82	642427	641514	0.349192	3.49192	2.86337	2.95925	2.95925e-06
106	10	73800	0.52	0.82	90708.5	89795.6	0.049824	0.49824	0.408557	5.536	5.536e-06
113	10	24600	0.4	0.82	36628.5	35715.7	0.0204797	0.204797	0.167934	6.82657	6.82657e-06
117	10	118900	0.38	0.82	110767	109854	0.060708	0.60708	0.497806	4.18676	4.18676e-06

## Sheet: PAM EQY
Frag #	PAM #1.1	PAM #1.2	PAM #1.3	PAM #1.4	PAM #1 AVG	PAM #2.1	PAM #2.2	PAM #2.3	PAM #2.4	PAM #2 AVG	PAM #3.1	PAM #3.2	PAM #3.3	PAM #3.4	PAM #3 AVG	PAM #4.1	PAM #4.2	PAM #4.3	PAM #4.4	PAM #4 AVG	PAM #5.1	PAM #5.2	PAM #5.3	PAM #5.4	PAM #5 AVG	PAM #6.1	PAM #6.2	PAM #6.3	PAM #6.4	PAM #6 AVG	PAM #7.1	PAM #7.2	PAM #7.3	PAM #7.4	PAM #7 AVG	PAM #8.1	PAM #8.2	PAM #8.3	PAM #8.4	PAM #8 AVG	PAM #9.1	PAM #9.2	PAM #9.3	PAM #9.4	PAM #9 AVG	PAM #10.1	PAM #10.2	PAM #10.3	PAM #10.4
2	539	525	637	622	0.58075	536	617	611	511	0.56875	529	617	576	534	0.564	536	597	571	422	0.5315	548	451	472	452	0.48075	445	463	588	481	0.49425	611	576	436	659	0.5705	406	496	566	503	0.49275	511	565	549	496	0.53025	593	612	604	567
4	650	575	562	620	0.60175	625	618	627	605	0.61875	575	591	555	543	0.566	501	554	580	563	0.5495	574	544	627	510	0.56375	517	625	622	569	0.58325	621	620	663	636	0.635	569	596	592	538	0.57375	549	598	630	529	0.5765	602	509	560	607
6	613	640	604	582	0.60975	638	639	597	576	0.6125	567	574	619	625	0.59625	531	461	606	585	0.54575	641	553	442	545	0.54525	560	585	510	537	0.548	608	507	486	600	0.55025	496	571	621	593	0.57025	567	518	567	520	0.543	547	485	475	603
8	587	612	617	630	0.6115	633	641	581	568	0.60575	601	623	617	592	0.60825	571	560	531	607	0.56725	558	603	613	567	0.58525	596	594	526	564	0.57	558	602	595	561	0.579	532	385	500	578	0.49875	534	545	558	533	0.5425	613	620	576	514
10	637	613	627	624	0.62525	552	593	629	578	0.588	603	619	629	621	0.618	589	577	588	557	0.57775	620	591	565	535	0.57775	581	571	592	619	0.59075	556	586	551	589	0.5705	584	610	556	548	0.5745	590	475	557	597	0.55475	477	598	542	527
12	637	638	665	660	0.65	663	651	603	600	0.62925	661	678	637	637	0.65325	555	560	627	607	0.58725	662	608	534	591	0.59875	556	563	600	564	0.57075	525	645	616	637	0.60575	618	548	554	467	0.54675	503	483	601	615	0.5505	536	568	466	483
18	648	618	616	635	0.62925	606	619	650	644	0.62975	617	586	590	554	0.58675	593	546	626	629	0.5985	555	576	581	563	0.56875	588	533	546	514	0.54525	619	528	400	607	0.5385	567	557	578	593	0.57375	649	526	592	535	0.5755	559	561	512	509
20	664	626	634	679	0.65075	606	618	654	608	0.6215	683	612	600	670	0.64125	572	626	627	623	0.612	638	617	565	629	0.61225	495	600	622	586	0.57575	604	639	561	659	0.61575	525	576	572	561	0.5585	621	572	558	580	0.58275	531	579	569	593
22	583	601	614	572	0.5925	606	670	578	592	0.6115	613	582	614	559	0.592	614	641	634	639	0.632	614	618	627	642	0.62525	594	563	556	585	0.5745	658	626	604	581	0.61725	629	597	648	588	0.6155	572	569	620	524	0.57125	606	594	565	594
23	617	605	625	610	0.61425	641	635	617	631	0.631	620	622	598	614	0.6135	614	604	609	590	0.60425	591	608	587	582	0.592	588	577	578	586	0.58225	613	627	627	585	0.613	619	575	607	606	0.60175	618	592	613	589	0.603	602	602	598	587
30	603	583	609	558	0.58825	558	604	626	610	0.5995	615	618	618	574	0.60625	534	563	615	615	0.58175	546	594	587	584	0.57775	568	584	595	584	0.58275	581	663	556	577	0.59425	583	577	594	588	0.5855	591	599	595	587	0.593	608	605	597	584
33	625	583	567	609	0.596	617	622	634	569	0.6105	592	582	573	590	0.58425	588	630	604	585	0.60175	594	618	602	603	0.60425	590	603	581	597	0.59275	593	587	612	551	0.58575	590	577	598	581	0.5865	604	589	618	591	0.6005	602	630	605	602
34	613	619	611	604	0.61175	600	641	603	636	0.62	634	605	592	593	0.606	621	611	617	635	0.621	615	592	609	597	0.60325	611	593	569	617	0.5975	601	600	609	614	0.606	603	598	580	621	0.6005	604	619	644	604	0.61775	616	597	611	593
36	577	597	608	591	0.59325	564	593	591	580	0.582	571	616	604	574	0.59125	614	572	583	655	0.606	586	591	592	567	0.584	546	546	608	576	0.569	587	576	606	586	0.58875	584	597	614	581	0.594	582	586	599	600	0.59175	565	586	601	575
39	581	591	610	572	0.5885	627	610	601	617	0.61375	592	595	594	589	0.5925	591	611	596	589	0.59675	623	600	601	594	0.6045	606	546	562	595	0.57725	607	606	590	587	0.5975	591	581	591	606	0.59225	598	586	557	574	0.57875	593	606	599	578
40	614	605	613	593	0.60625	622	601	599	653	0.61875	615	584	604	610	0.60325	651	624	627	589	0.62275	616	580	606	583	0.59625	543	628	608	595	0.5935	563	628	633	615	0.60975	606	644	632	594	0.619	611	610	590	589	0.6	603	583	585	564
43	596	572	590	593	0.58775	599	592	584	590	0.59125	620	581	605	562	0.592	647	578	660	616	0.62525	581	635	585	611	0.603	589	549	528	597	0.56575	584	658	605	665	0.628	572	638	649	558	0.60425	594	612	580	575	0.59025	610	588	570	573
44	592	603	621	582	0.5995	578	563	629	625	0.59875	599	592	597	629	0.60425	631	598	596	605	0.6075	601	614	607	600	0.6055	578	568	595	578	0.57975	619	641	612	604	0.619	625	620	639	592	0.619	600	621	593	603	0.60425	628	604	609	600
47	604	631	586	605	0.6065	599	564	618	625	0.6015	571	587	605	567	0.5825	576	607	674	580	0.60925	641	601	567	609	0.6045	591	583	562	558	0.5735	564	620	602	615	0.60025	670	589	560	622	0.61025	599	565	626	576	0.5915	622	587	594	578
49	574	605	593	560	0.583	620	591	591	584	0.5965	590	620	594	597	0.60025	625	588	659	614	0.6215	638	612	607	576	0.60825	605	583	592	592	0.593	627	677	695	570	0.64225	648	674	656	616	0.6485	634	586	581	595	0.599	576	605	624	595
50	573	585	616	600	0.5935	628	649	616	618	0.62775	598	631	584	602	0.60375	659	602	642	632	0.63375	611	584	614	618	0.60675	602	619	621	628	0.6175	592	616	664	663	0.63375	615	631	655	612	0.62825	690	602	603	617	0.628	615	585	546	558
56	624	599	571	587	0.59525	572	580	580	596	0.582	597	584	564	600	0.58625	538	585	612	553	0.572	625	580	589	577	0.59275	569	513	567	591	0.56	683	610	611	610	0.6285	556	503	619	550	0.557	626	579	685	577	0.61675	570	566	622	584
58	591	563	577	586	0.57925	615	593	579	574	0.59025	577	588	585	571	0.58025	614	596	578	608	0.599	576	593	575	583	0.58175	599	581	586	583	0.58725	588	622	646	614	0.6175	588	620	618	609	0.60875	695	559	579	592	0.60625	586	621	578	588
59	595	585	593	593	0.5915	593	580	598	590	0.59025	607	571	603	573	0.5885	568	599	562	580	0.57725	581	601	594	604	0.595	595	592	568	560	0.57875	601	616	593	588	0.5995	610	602	567	553	0.583	587	567	558	585	0.57425	584	587	563	579
62	577	635	562	609	0.59575	594	645	617	588	0.611	525	596	588	571	0.57	596	559	592	590	0.58425	586	579	565	547	0.56925	589	564	564	534	0.56275	525	584	558	615	0.5705	565	633	586	580	0.591	546	562	496	569	0.54325	652	529	498	564
64	583	640	593	568	0.596	647	644	638	595	0.631	575	603	658	659	0.62375	577	669	580	606	0.608	563	593	616	607	0.59475	647	616	610	574	0.61175	720	589	634	601	0.636	626	708	607	610	0.63775	612	607	587	568	0.5935	595	561	633	607
65	638	615	633	644	0.6325	644	596	571	651	0.6155	558	610	674	561	0.60075	622	627	646	593	0.622	622	556	550	606	0.5835	624	568	559	594	0.58625	603	599	655	580	0.60925	703	548	501	608	0.59	581	560	567	599	0.57675	526	613	610	594
70	623	640	648	627	0.6345	644	658	672	632	0.6515	650	616	644	649	0.63975	628	621	638	633	0.63	639	598	588	622	0.61175	622	595	603	587	0.60175	650	626	611	691	0.6445	647	641	636	595	0.62975	624	608	615	658	0.62625	637	681	631	571
72	638	649	656	652	0.64875	657	653	641	629	0.645	634	654	638	630	0.639	640	652	614	637	0.63575	649	651	638	615	0.63825	638	640	606	623	0.62675	641	614	669	649	0.64325	671	663	629	625	0.647	606	638	628	602	0.6185	648	531	596	623
76	658	624	635	611	0.632	648	577	590	638	0.61325	597	632	634	608	0.61775	664	628	637	630	0.63975	610	626	634	597	0.61675	646	591	613	624	0.6185	637	635	605	609	0.6215	626	606	578	607	0.60425	617	602	622	583	0.606	637	562	575	595
79	624	592	594	640	0.6125	580	606	623	596	0.60125	628	591	659	641	0.62975	629	592	572	667	0.615	602	619	609	636	0.6165	662	564	568	677	0.61775	682	658	594	694	0.657	611	657	594	630	0.623	559	631	618	600	0.602	599	617	644	589
82	571	616	609	608	0.601	594	620	629	662	0.62625	548	596	533	593	0.5675	600	594	606	607	0.60175	580	595	592	611	0.5945	593	600	597	618	0.602	615	675	649	637	0.644	676	600	605	637	0.6295	593	602	649	613	0.61425	636	617	613	604
83	644	619	620	628	0.62775	620	580	639	609	0.612	585	634	624	615	0.6145	611	598	621	619	0.61225	598	579	586	630	0.59825	647	601	610	637	0.62375	632	654	624	608	0.6295	614	632	640	591	0.61925	602	625	622	607	0.614	610	607	613	617
88	617	595	595	599	0.6015	619	603	614	626	0.6155	612	588	592	602	0.5985	606	640	637	602	0.62125	598	615	620	631	0.616	608	675	619	596	0.6245	647	687	608	667	0.65225	591	696	611	608	0.6265	615	617	616	610	0.6145	602	607	613	635
89	575	625	591	591	0.5955	577	570	592	593	0.583	605	608	571	611	0.59875	592	588	627	619	0.6065	644	614	602	603	0.61575	588	607	657	616	0.617	622	593	635	653	0.62575	622	607	603	612	0.611	596	600	615	609	0.605	614	609	629	603
93	602	633	604	617	0.614	600	632	679	589	0.625	580	607	617	577	0.59525	607	609	593	586	0.59875	569	581	578	602	0.5825	628	559	645	586	0.6045	618	675	630	613	0.634	597	591	622	584	0.5985	620	586	587	590	0.59575	595	600	656	585
97	582	581	619	617	0.59975	598	643	605	575	0.60525	541	603	588	584	0.579	588	589	606	626	0.60225	583	596	570	609	0.5895	568	591	579	604	0.5855	615	605	584	636	0.61	593	606	639	636	0.6185	594	622	615	589	0.605	610	658	614	624
98	627	615	620	615	0.61925	579	636	624	583	0.6055	584	605	584	582	0.58875	614	626	587	577	0.601	589	629	611	635	0.616	680	612	613	585	0.6225	632	618	702	624	0.644	574	581	578	604	0.58425	610	616	590	602	0.6045	612	613	589	633
99	608	622	601	639	0.6175	598	620	571	607	0.599	595	593	593	599	0.595	575	606	658	601	0.61	603	583	600	609	0.59875	642	621	591	604	0.6145	625	645	633	640	0.63575	652	643	589	581	0.61625	592	618	614	601	0.60625	627	605	603	599
101	597	620	620	600	0.60925	629	612	589	592	0.6055	597	604	645	575	0.60525	613	606	631	626	0.619	592	602	594	623	0.60275	563	647	638	596	0.611	667	623	646	650	0.6465	599	616	641	619	0.61875	620	616	621	594	0.61275	626	611	615	670
102	596	614	608	598	0.604	601	594	624	580	0.59975	602	599	568	588	0.58925	595	606	608	650	0.61475	603	583	574	586	0.5865	586	589	621	605	0.60025	616	669	638	582	0.62625	569	611	614	599	0.59825	620	563	600	569	0.588	588	614	586	619
103	613	620	622	615	0.6175	573	552	530	644	0.57475	587	594	597	616	0.5985	600	588	597	625	0.6025	626	600	647	648	0.63025	614	629	611	602	0.614	648	658	601	629	0.634	605	650	726	627	0.652	618	573	593	594	0.5945	609	608	616	588
112	606	621	611	602	0.61	649	602	573	657	0.62025	615	599	586	597	0.59925	620	608	586	613	0.60675	577	624	636	620	0.61425	589	589	579	647	0.601	611	671	698	680	0.665	628	640	625	607	0.625	658	629	611	616	0.6285	593	654	588	601
114	630	614	595	593	0.608	570	598	581	576	0.58125	598	601	585	582	0.5915	594	656	602	634	0.6215	600	553	596	625	0.5935	608	598	609	575	0.5975	613	611	652	672	0.637	639	663	657	636	0.64875	595	574	612	603	0.596	598	614	587	593
118	658	631	626	594	0.62725	571	582	570	608	0.58275	589	603	609	596	0.59925	609	617	590	588	0.601	601	584	607	591	0.59575	605	599	599	564	0.59175	665	630	727	719	0.68525	614	640	673	658	0.64625	593	590	616	616	0.60375	624	605	608	626
119	637	594	601	605	0.60925	572	620	575	635	0.6005	601	608	594	590	0.59825	607	609	596	590	0.6005	635	602	607	605	0.61225	607	588	604	606	0.60125	639	666	610	625	0.635	601	628	632	600	0.61525	597	614	610	611	0.608	609	588	592	619
120	630	594	620	606	0.6125	554	631	670	630	0.62125	608	587	596	584	0.59375	586	598	595	615	0.5985	609	609	602	621	0.61025	582	624	599	620	0.60625	697	612	621	671	0.65025	645	643	596	599	0.62075	626	604	612	610	0.613	620	621	616	626
[truncated: 71 more columns]

## Sheet: Jaccard
	CTC2Day1_3	ETC3Day1_1	ETC3Day1_2	ETC3Day1_3	ETC3Day3_1	ETC3Day3_2	CTC3Day1_3	CTC3Day3_1	CTC3Day3_2	ETC2Day1_3	ETC2Day3_1	ETC2Day3_2	ETC2Day3_3	CTC2Day1_1	CTC2Day1_2	CTC2Day3_1	CTC2Day3_2	CTC2Day3_3	ETC2Day1_2	ETC3Day3_3	CTC3Day1_1	CTC3Day1_2	ETC2Day1_1	CTC3Day3_3	ETC1Day1_2	CTC1Day3_2	ETC1Day3_1	CTC1Day1_3	ETC1Day3_2	ETC1Day3_3	ETC1Day1_3	CTC1Day3_1	ETC1Day1_1	CTC1Day1_1	CTC1Day3_3	CTC1Day1_2
CTC2Day1_3
ETC3Day1_1	100
ETC3Day1_2	100	100
ETC3Day1_3	100	100	100
ETC3Day3_1	100	100	100	100
ETC3Day3_2	100	100	100	100	100
CTC3Day1_3	50	50	50	50	50	50
CTC3Day3_1	50	50	50	50	50	50	20
CTC3Day3_2	66.6667	66.6667	66.6667	66.6667	66.6667	66.6667	66.6667	25
ETC2Day1_3	33.3333	33.3333	33.3333	33.3333	33.3333	33.3333	60	33.3333	40
ETC2Day3_1	33.3333	33.3333	33.3333	33.3333	33.3333	33.3333	60	33.3333	40	100
ETC2Day3_2	33.3333	33.3333	33.3333	33.3333	33.3333	33.3333	60	33.3333	40	100	100
ETC2Day3_3	60	60	60	60	60	60	33.3333	60	40	66.6667	66.6667	66.6667
CTC2Day1_1	33.3333	33.3333	33.3333	33.3333	33.3333	33.3333	60	33.3333	40	100	100	100	66.6667
CTC2Day1_2	33.3333	33.3333	33.3333	33.3333	33.3333	33.3333	60	33.3333	40	100	100	100	66.6667	100
CTC2Day3_1	60	60	60	60	60	60	33.3333	60	40	66.6667	66.6667	66.6667	100	66.6667	66.6667
CTC2Day3_2	33.3333	33.3333	33.3333	33.3333	33.3333	33.3333	60	33.3333	40	100	100	100	66.6667	100	100	66.6667
CTC2Day3_3	33.3333	33.3333	33.3333	33.3333	33.3333	33.3333	60	33.3333	40	100	100	100	66.6667	100	100	66.6667	100
ETC2Day1_2	50	50	50	50	50	50	50	50	33.3333	83.3333	83.3333	83.3333	83.3333	83.3333	83.3333	83.3333	83.3333	83.3333
ETC3Day3_3	75	75	75	75	75	75	40	40	50	50	50	50	80	50	50	80	50	50	66.6667
CTC3Day1_1	75	75	75	75	75	75	40	40	50	50	50	50	80	50	50	80	50	50	66.6667	100
CTC3Day1_2	75	75	75	75	75	75	40	40	50	50	50	50	80	50	50	80	50	50	66.6667	100	100
ETC2Day1_1	50	50	50	50	50	50	50	20	66.6667	33.3333	33.3333	33.3333	33.3333	33.3333	33.3333	33.3333	33.3333	33.3333	28.5714	40	40	40
CTC3Day3_3	25	25	25	25	25	25	25	25	33.3333	40	40	40	40	40	40	40	40	40	33.3333	50	50	50	25
ETC1Day1_2	0	0	0	0	0	0	0	0	0	0	0	0	0	0	0	0	0	0	0	0	0	0	20	0
CTC1Day3_2	0	0	0	0	0	0	0	0	0	0	0	0	0	0	0	0	0	0	0	0	0	0	16.6667	0	75
ETC1Day3_1	0	0	0	0	0	0	0	0	0	0	0	0	0	0	0	0	0	0	0	0	0	0	14.2857	0	60	80
CTC1Day1_3	0	0	0	0	0	0	0	0	0	0	0	0	0	0	0	0	0	0	0	0	0	0	14.2857	0	60	50	66.6667
ETC1Day3_2	0	0	0	0	0	0	0	0	0	0	0	0	0	0	0	0	0	0	0	0	0	0	16.6667	0	75	60	80	80
ETC1Day3_3	0	0	0	0	0	0	0	0	0	0	0	0	0	0	0	0	0	0	0	0	0	0	16.6667	0	75	60	50	50	60
ETC1Day1_3	0	0	0	0	0	0	0	0	0	0	0	0	0	0	0	0	0	0	0	0	0	0	14.2857	0	60	50	66.6667	66.6667	80	50
CTC1Day3_1	25	25	25	25	25	25	11.1111	25	12.5	9.09091	9.09091	9.09091	20	9.09091	9.09091	20	9.09091	9.09091	18.1818	22.2222	22.2222	22.2222	25	12.5	42.8571	57.1429	71.4286	50	57.1429	37.5	50
ETC1Day1_1	0	0	0	0	0	0	0	0	0	0	0	0	0	0	0	0	0	0	0	0	0	0	11.1111	0	42.8571	57.1429	71.4286	50	57.1429	37.5	71.4286	55.5556
CTC1Day1_1	9.09091	9.09091	9.09091	9.09091	9.09091	9.09091	0	9.09091	0	0	0	0	7.69231	0	0	7.69231	0	0	7.14286	8.33333	8.33333	8.33333	9.09091	0	33.3333	44.4444	55.5556	40	44.4444	30	55.5556	60	77.7778
CTC1Day3_3	10	10	10	10	10	10	0	10	0	0	0	0	8.33333	0	0	8.33333	0	0	7.69231	9.09091	9.09091	9.09091	10	0	37.5	50	44.4444	44.4444	33.3333	33.3333	30	50	50	54.5455
CTC1Day1_2	0	0	0	0	0	0	0	0	0	0	0	0	0	0	0	0	0	0	0	0	0	0	14.2857	0	60	50	42.8571	42.8571	50	50	66.6667	33.3333	71.4286	55.5556	44.4444
Colony	2	3	3	3	3	3	3	3	3	2	2	2	2	2	2	2	2	2	2	3	3	3	2	3	1	1	1	1	1	1	1	1	1	1	1	1
Treatment	CT	ET	ET	ET	ET	ET	CT	CT	CT	ET	ET	ET	ET	CT	CT	CT	CT	CT	ET	ET	CT	CT	ET	CT	ET	CT	ET	CT	ET	ET	ET	CT	ET	CT	CT	CT
Day	1	1	1	1	3	3	1	3	3	1	3	3	3	1	1	3	3	3	1	3	1	1	1	3	1	3	3	1	3	3	1	3	1	1	3	1
